# Supplementary material
Source: PubMed Central journal article supplement (PMC3501066)
Supplement: supp_M112.405076_jbc.M112.405076-1.pdf [file supp_M112.405076_jbc.M112.405076-1.pdf]

**Elastolytic mechanism of a novel M23 metalloprotease pseudoalterin from deep-sea *Pseudoalteromonas* sp. CF6-2: cleaving not only the glycyI bonds in the hydrophobic regions, but also the peptide bonds in the hydrophilic regions involved in crosslinking**

Hui-Lin Zhao<sup>1</sup>, Xiu-Lan Chen<sup>1</sup>, Bin-Bin Xie<sup>1</sup>, Ming-Yang Zhou<sup>1</sup>, Xiang Gao<sup>1</sup>, Xi-Ying Zhang<sup>1</sup>,  
Bai-Cheng Zhou<sup>1</sup>, Anthony S. Weiss<sup>2</sup>, Yu-Zhong Zhang<sup>1</sup>

<sup>1</sup> State Key Laboratory of Microbial Technology, Marine Biotechnology Research Center, Shandong University, Jinan 250100, P. R. China

<sup>2</sup> School of Molecular Bioscience, The University of Sydney, NSW 2006, Australia

Running title: Elastolytic mechanism of a novel M23 metalloprotease

Address correspondence to: Yu-Zhong Zhang, State Key Laboratory of Microbial Technology, Marine Biotechnology Research Center, Shandong University, Jinan 250100, P. R. China. Tel: +86-531-88364326; Fax: +86-531-88564326. E-mail: [zhangyz@sdu.edu.cn](mailto:zhangyz@sdu.edu.cn)

## **Supplementary Data**

## Part I. Purification and characterization of pseudoalterin

Table S1. Purification of the protease secreted by *Pseudoalteromonas* sp. CF6-2

| Procedure                | Volume (ml) | Protein concentration (mg/ml) | Total protein (mg) | Total Activity (U) | Specific Activity (U/mg) | Purification (fold) | Yield (%) |
|--------------------------|-------------|-------------------------------|--------------------|--------------------|--------------------------|---------------------|-----------|
| Culture supernatant      | 100         | 0.1123                        | 11.23              | 1504               | 133.93                   | 1                   | 100       |
| DEAE sepharose fast flow | 20          | 0.126                         | 2.52               | 506.6              | 201.03                   | 1.50                | 33.68     |

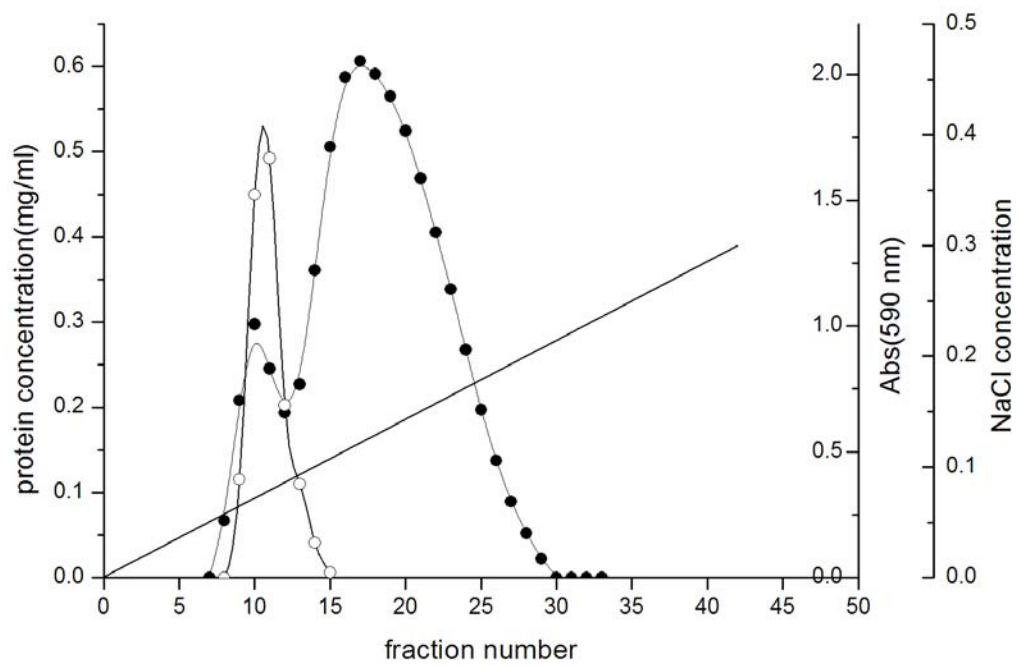

Fig. S1. Purification of pseudoalterin by ion-exchange chromatography on a DEAE-Sepharose Fast Flow column. ●, protein concentration; ○, relative protease activity; —, NaCl concentration.

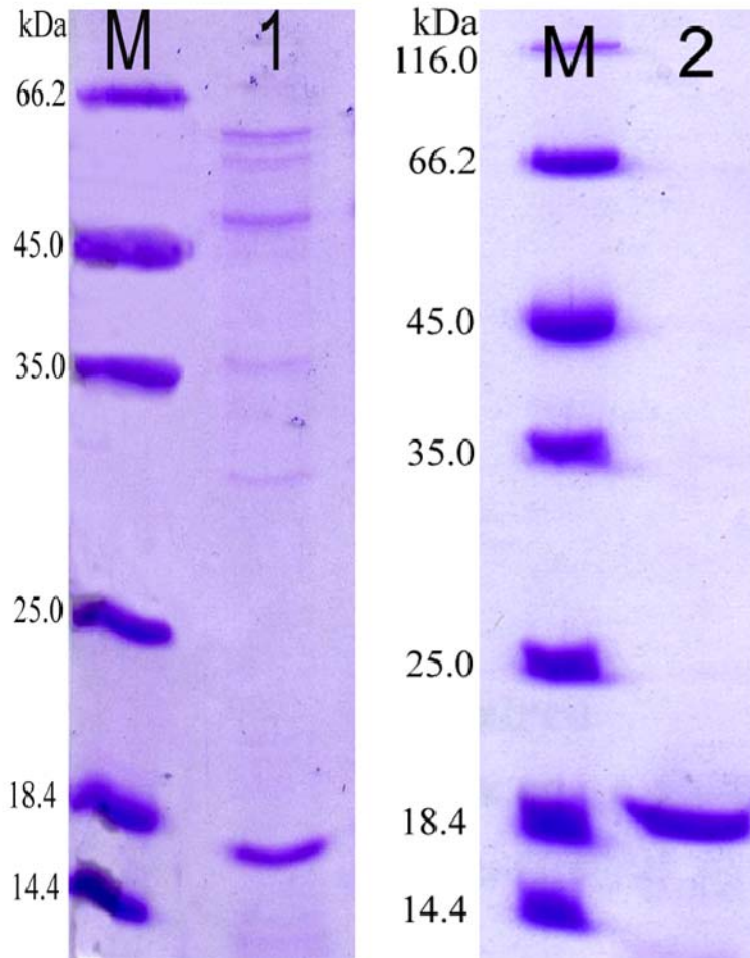

Fig. S2. Analysis of the purity of pseudoalterin by SDS-PAGE.1, proteins in *Ps. sp.* CF6-2 culture supernatant; 2, pseudoalterin purified by ion exchange chromatography; M: marker.

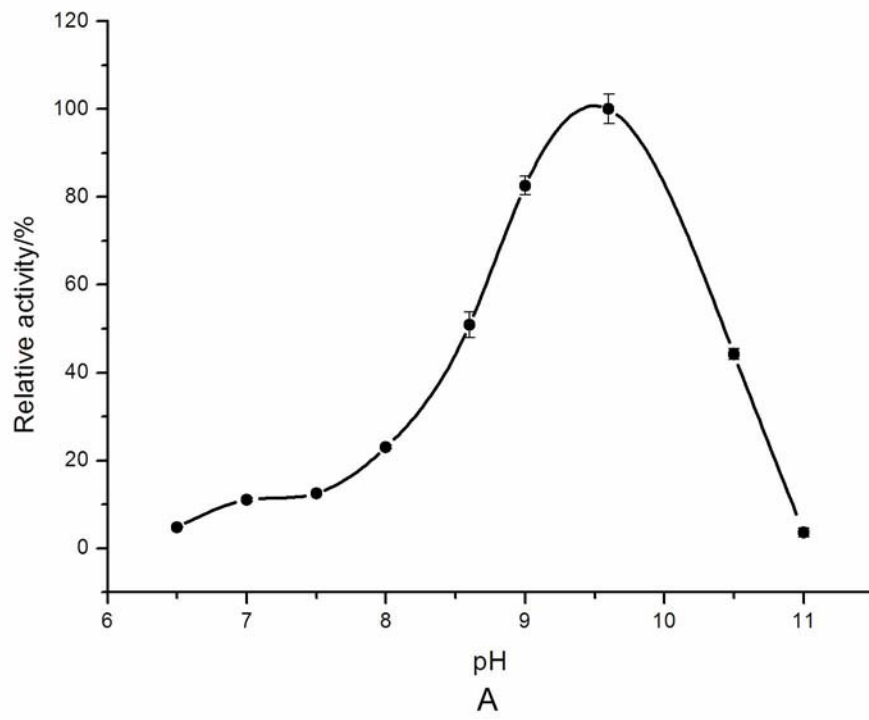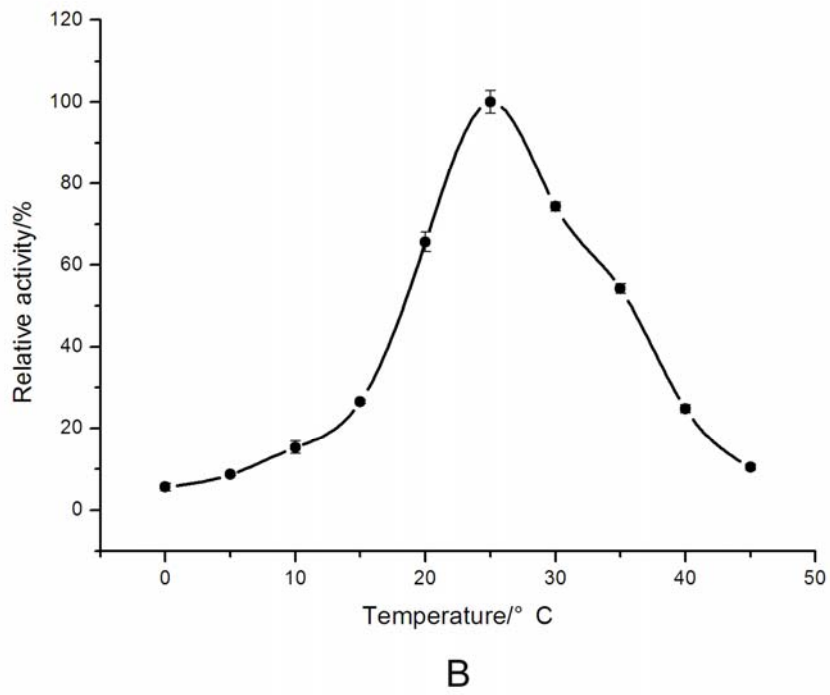

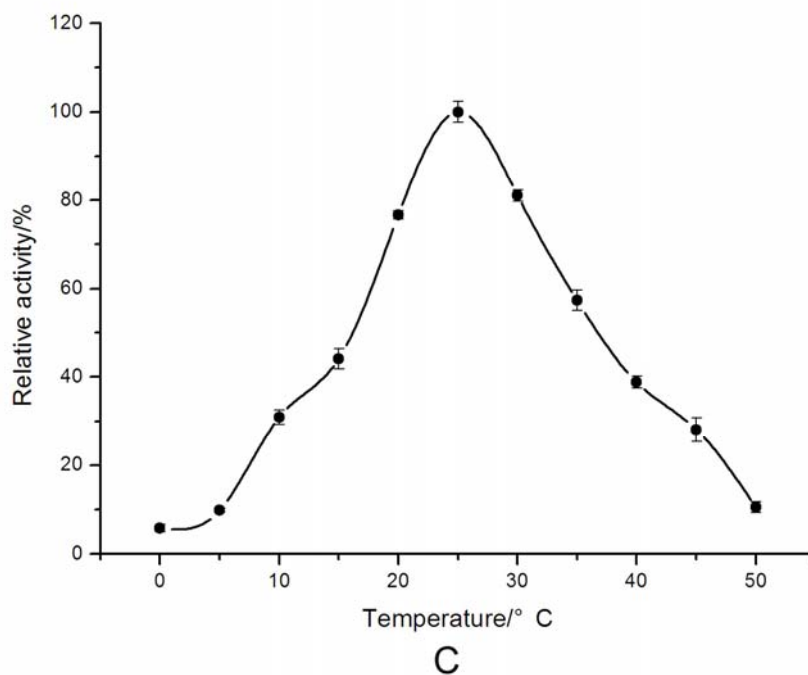

Fig. S3. Effect of temperature and pH on the activity of pseudoalterin. A, Effect of pH on pseudoalterin activity. The optimum pH was determined by measuring the activities of pseudoalterin with elastinorcein at 30°C in Na<sub>2</sub>HPO<sub>4</sub>-NaH<sub>2</sub>PO<sub>4</sub> buffer at pHs ranging from 6.5 to 8, barbital sodium-HCl buffer at pHs ranging from 7.5 to 9.6 and NaHCO<sub>3</sub>-NaOH buffer ranging from 9.6 to 11.0. B, Effect of temperature on pseudoalterin activity. C, Effect of temperature on pseudoalterin activity in artificial sea water. The optimum temperature was determined by measuring the activities of pseudoalterin with elastinorcein in 50 mM Tris buffer (pH 9.0) or in artificial sea water at temperatures ranging from 0 to 45°C. The data shown are the mean of three repeats with standard deviations ≤ 5%.

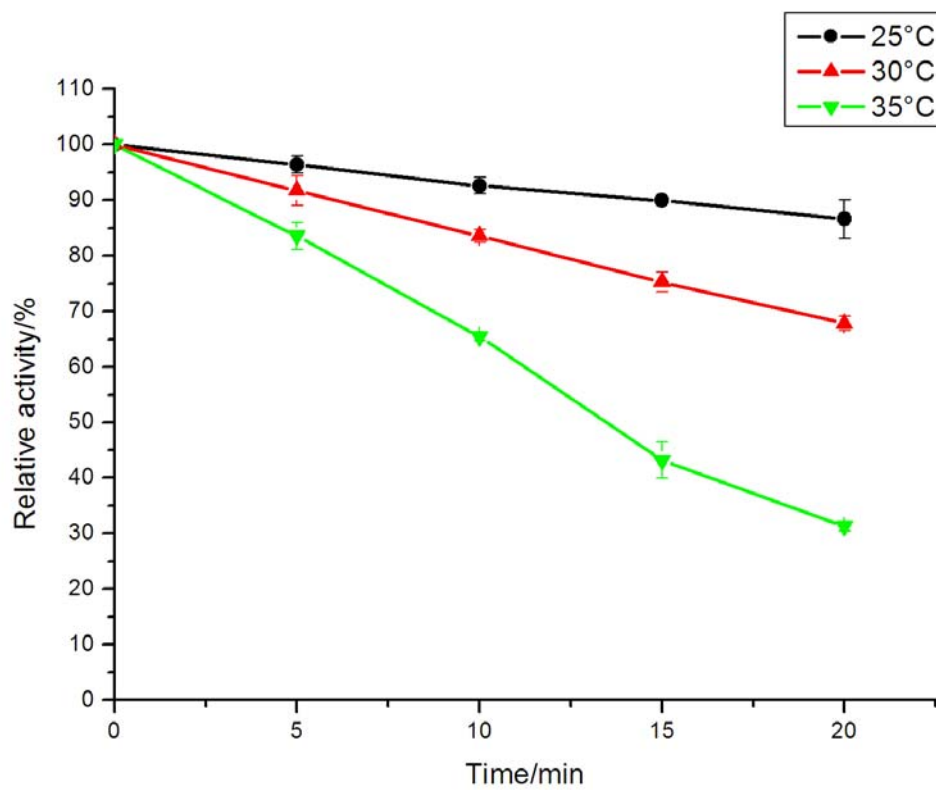

Fig. S4. Effect of temperature on the thermostability of pseudoalterin. The concentration of the incubated pseudoalterin is 0.1 mg/mL. The data shown are the means of three repeats with standard deviations  $\leq 5\%$ .

|                                                                                                                                             |                                  |      |
|---------------------------------------------------------------------------------------------------------------------------------------------|----------------------------------|------|
|                                                                                                                                             | ATGGGGTTTTATAAAAAGGAACAAAAAG     | -1   |
| Strat Codon                                                                                                                                 |                                  |      |
| <span style="border: 1px solid black; padding: 2px;">ATG</span> AAT AAA CAT TTA CTA ACA CTT GCG GTT ACG ACT GGA CTT GGT TTT TCT TCT ATA GCG |                                  | 60   |
| M N K H L L T L A V T T G L G F S S I A                                                                                                     |                                  | 20   |
|                                                                                                                                             | Signal Sequence                  |      |
| TTT GCC GGT GTG CAT AAC CAT GAA ACG TTT GAA TTT TCA GAC CAA GCA GTA GAA CAA CTG                                                             |                                  | 120  |
| F A G V H N H E T F E F S D Q A V E Q L                                                                                                     |                                  | 40   |
| AAT CTT AAT TCA TTA TTA ATT ATG GAT GAC CAA ACA TTT GTA TTT AAT AAT GAC CTA TTA                                                             |                                  | 180  |
| N L N S L L I M D D Q T F V F N N D L L                                                                                                     |                                  | 60   |
| AAT GAA GAC TGG GAT AAC TAC TTC GCG TCG TAT GCC CCT GAA CTT CAA AGT AAA CAA GCT                                                             |                                  | 240  |
| N E D W D N Y F A S Y A P E L Q S K Q A                                                                                                     |                                  | 80   |
| TTT ATA CTA CAC TGG GCT GGC TAT TAT AGT ATT AAC CCA AAA GTG ATT TTG GCA CTG ATT                                                             |                                  | 300  |
| F I L H W A G Y Y S I N P K V I L A L I                                                                                                     |                                  | 100  |
| GAA CAG CAA AGT GAG GGA CTC TCT GAT CCT TCG GTT GAA TTA GAA AGC GTG TTT AAA AAT                                                             |                                  | 360  |
| E Q Q S E G L S D P S V E L E S V F K N                                                                                                     |                                  | 120  |
| ATC TCT GAC AAG CAA GGA TTT GAG GAG CAG GTT AAA GAC GTT GTA TTT AAA TTA AGT CAA                                                             |                                  | 420  |
| I S D K Q G F E E Q V K D V V F K L S Q                                                                                                     |                                  | 140  |
| CGT TTC TAT GCC TTT AAA CAC TGG CAA GAG CAA GCC GTA AAG CAT GAT AAA AAC TCA AAC                                                             |                                  | 480  |
| R F Y A F K H W Q E Q A V K H D K N S N                                                                                                     |                                  | 160  |
| TCC ATA AAG CAT TTA ATT AGG CCT TCA CAA GTG AGT ACT GCC GCT ACA GCT GCG CTT GCC                                                             |                                  | 540  |
| S I K H L I R P S Q V S T A A T A A L A                                                                                                     |                                  | 180  |
| AGC ATG ATG AGT AAG CAG CAC AAT CTG CAT GGT CAG GCA AAT GAT TCT TTA ACT CGC TTC                                                             |                                  | 600  |
| S M M S K Q H N L H G Q A N D S L T R F                                                                                                     |                                  | 200  |
| TTA GAT ATA TTC GAG CAA CTA TCA CCC GAA CAG TCT CTT ATC TTG AAC ACA GAC CAA GTC                                                             |                                  | 660  |
| L D I F E Q L S P E Q S L I L N T D Q V                                                                                                     |                                  | 220  |
| ACT TTC TCA GGG GAA GAG CAG TCG GTT CAA GCC ACA TTT ACT ATG AAC TTA CCT TGG TCT                                                             |                                  | 720  |
| T F S G E E Q S V Q A T F T M N L P W S                                                                                                     |                                  | 240  |
|                                                                                                                                             | ← Pro-sequence ↑ Mature Enzyme → |      |
| CAA GGG TAT TAT TGG TAT AGT GGT GGA GCG CAT TCA AAC ACT GGC TCA GGT TAT CCT TAT                                                             |                                  | 780  |
| Q G Y Y W Y S G G A H S N T G S G Y P Y                                                                                                     |                                  | 260  |
|                                                                                                                                             | Zinc Ligand                      |      |
| TCT TCA TTA GAC TTT AAC AAT GGT TCT GGT GGA TGG GGA AGC AAT ACG CCT TGG GTT CAA                                                             |                                  | 840  |
| S S L D F N N G S G G W G S N T P W V Q                                                                                                     |                                  | 280  |
|                                                                                                                                             | Zinc Ligand                      |      |
| GCC GCA CAT GGT GGG GTC ATC ACT CGT TTT TCG TCA TGT AAT ATA CGG GTA ACG CAC TCA                                                             |                                  | 900  |
| A A H G G V I T R F S S C N I R V T H S                                                                                                     |                                  | 300  |
| AGT GGC TTT GCA ACT AAT TAT TAC CAC ATG TCT AAC TTA CAA TAC AAT AAT GGT GAC ACT                                                             |                                  | 960  |
| S G F A T N Y Y H M S N L Q Y N N G D T                                                                                                     |                                  | 320  |
| GTG CAG CCA GGA ACG TTG CTA GGT CGT TAT GCG AAT AGT TAT AAC CAA GCA CTG TGC GAA                                                             |                                  | 1020 |
| V Q P G T L L G R Y A N S Y N Q A L C E                                                                                                     |                                  | 340  |
| GGC GGA CAA TCG TCT GGT CCA CAC GTA CAC TTC ACT TTA TTA CAA AAT GGT CAG CAA GTT                                                             |                                  | 1080 |
| G G Q S S G P H V H F T L L Q N G Q Q V                                                                                                     |                                  | 360  |
|                                                                                                                                             | Active Site ★ Zinc Ligand        |      |
| TCA TTA CAT AAC CGT TAT ATC AGT AAT TAC CGT ATT GAT GTT GGT AAT AGT AAC TAT GAT                                                             |                                  | 1140 |
| S L H N R Y I S N Y R I D V G N S N Y D                                                                                                     |                                  | 380  |
| TCA AAT TGT AAT AAC TTT TAT TTT GAG CGC AAT GGA CGT AGA ACC TGT GCT TGG CGA CCC                                                             |                                  | 1200 |
| S N C N N F Y F E R N G R R T C A W R P                                                                                                     |                                  | 400  |
| TTA TAC CGT TAA                                                                                                                             |                                  | 1212 |
| L Y R                                                                                                                                       |                                  |      |

Fig.S5. The nucleotide and deduced amino acid sequences of pseudoalterin.



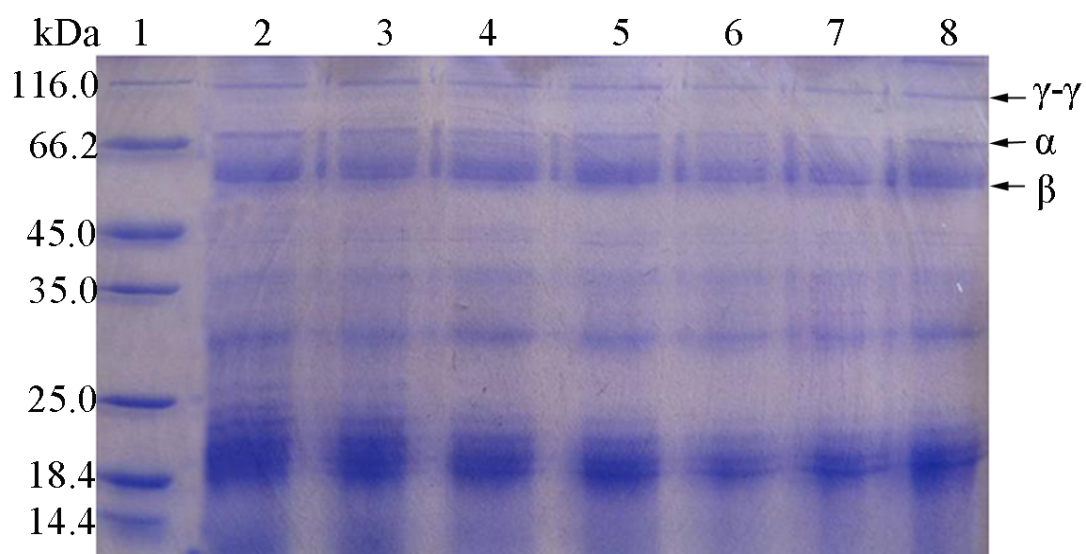

**A**

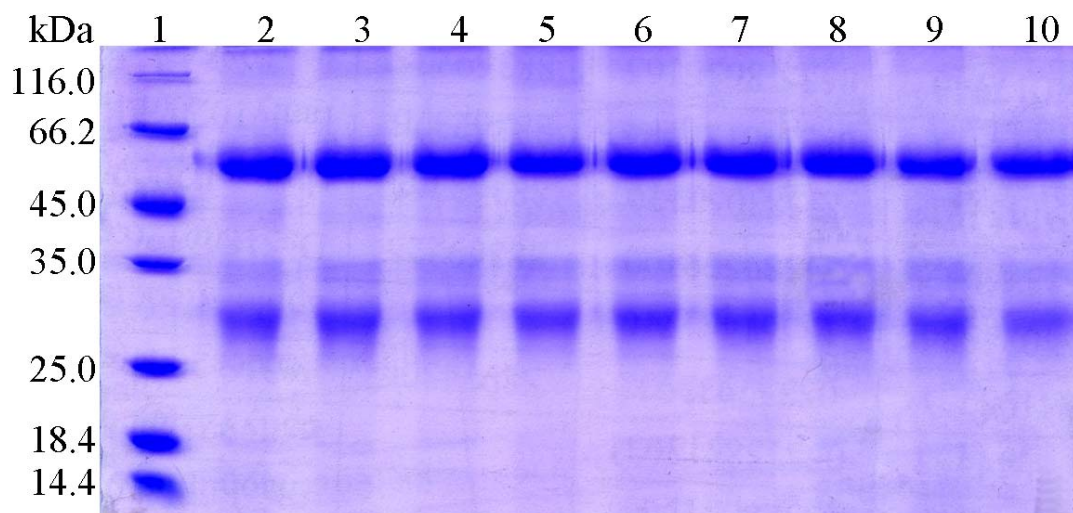

**B**

Fig.S6. SDS-PAGE analysis of the hydrolytic activities of pseudoalterin on fibrin and gamma-globulin. A, the hydrolysis of fibrin; 1, marker; 2, 3, 4, 5, 6, 7, 8 are samples taken at 0, 20, 40, 60, 80, 100, 120 min; B, the hydrolysis of gamma-globulin; 1, marker; 2, 3, 4, 5, 6, 7, 8, 9, 10 are samples taken at 0, 10, 20, 30, 40, 50, 60, 70, 80 min.

## Part II. Analysis of the cleavage pattern of oxidized insulin B chain by pseudoalterin.

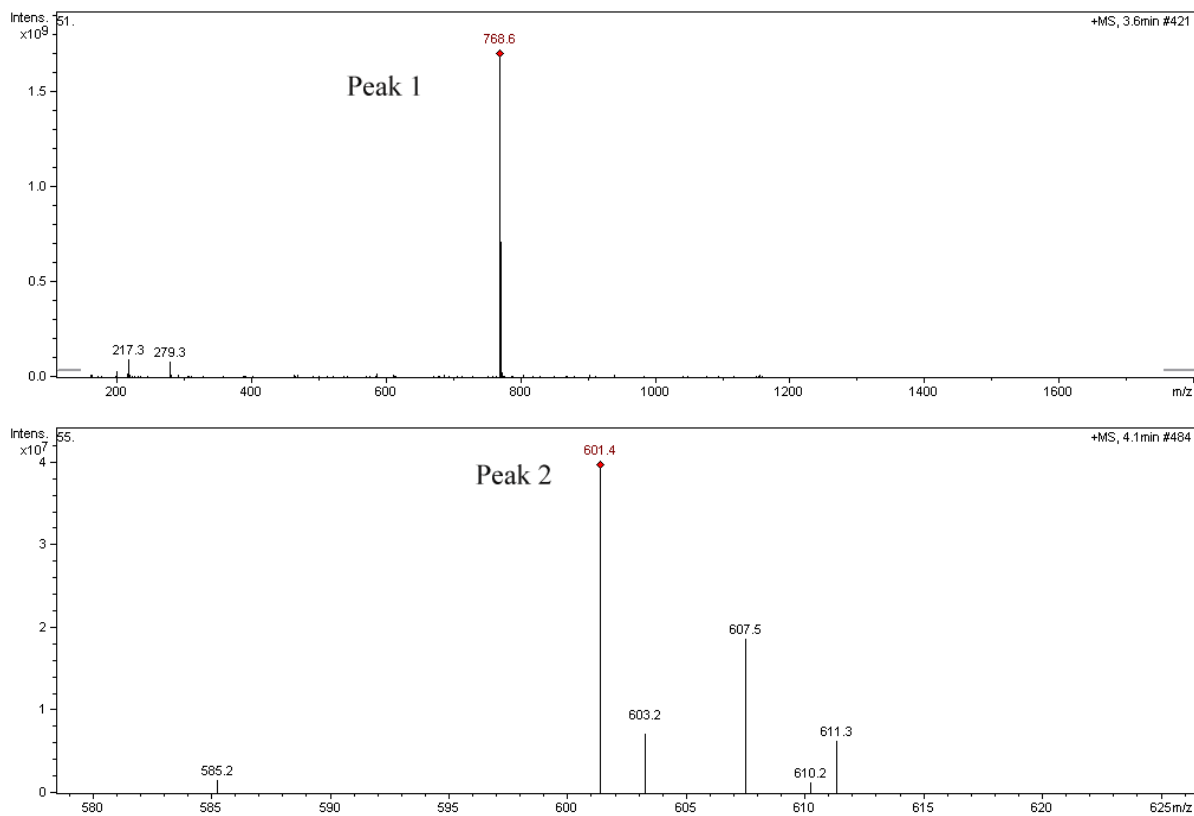

Fig. S7. Partial LC-MS analysis of the molecular weights of the peptides released from the oxidized insulin B chain by pseudoalterin.

Table S2. The determined molecular masses and sequences of the 16 peptides released from oxidized insulin B chain by pseudoalterin.

| Peak number | m/z Measured (Da) | MH <sup>+</sup> Matched (Da) | Peptide <sup>a</sup>                         | RT (min) | Position |
|-------------|-------------------|------------------------------|----------------------------------------------|----------|----------|
| 1           | 768.65            | 768.43                       | (G)SHLVEAL(Y)                                | 3.59     | 9-15     |
| 2           | 601.64            | 1201.60                      | (C)GERGFFYTPK(A)                             | 4.15     | 20-29    |
| 3           | 543.87            | 1086.57                      | (E)RGFFYTPKA                                 | 4.17     | 22-30    |
| 4           | 636.82            | 1272.64                      | (C)GERGFFYTPKA                               | 4.72     | 20-30    |
| 5           | 564.92            | 1128.84                      | (E)ALYLVCGERG(F)                             | 4.88     | 14-23    |
| 6           | 726.41            | 1451.82                      | (L)VCGERGFFYTPK(A)                           | 5.22     | 18-29    |
| 7           | 546.36            | 1091.72                      | (L)YLVCGERGF(F)                              | 5.26     | 16-24    |
| 8           | 761.96            | 1522.92                      | (L)VCGERGFFYTPKA                             | 5.30     | 18-30    |
| 9           | 783.00            | 1565.00                      | (Y)LVCGERGFFYTPK(A)                          | 5.63     | 17-29    |
| 10          | 818.48            | 1635.96                      | (Y)LVCGERGFFYTPKA                            | 5.66     | 17-30    |
| 11          | 647.89            | 1294.78                      | (G)SHLVEALYLVC(G)                            | 6.52     | 9-19     |
| 12          | 992.06            | 1983.12                      | (E)ALYLVCGERGFFYTPKA                         | 6.67     | 14-30    |
| 13          | 921.09            | 1841.18                      | (G)SHLVEALYLVCGERGF(F)                       | 6.69     | 9-24     |
| 14          | 1274.67           | 2548.34                      | (G)SHLVEALYLVCGERGFFYTPKA                    | 6.77     | 9-30     |
| 15          | 826.49            | 2477.47                      | (G)SHLVEALYLVCGERGFFYTPK(A)                  | 6.78     | 9-29     |
| 16          | 1166.00           | 3495.00                      | FVDQHLVC <sup>u</sup> SHLVEALYLVCGERGFFYTPKA | 8.39     | 1-30     |

<sup>a</sup> The sequence of each peptide in black was determined by liquid chromatography-mass spectrometry and MASCOT MS/MS Ion Research tools. The left bracketed residue of each peptide indicates the P1-site residue of the left cleavage site. The right bracketed residue of each peptide indicates the P1'-site residue of the right cleavage site. The underline cysteine residues indicate that they are oxidized cysteine residues.

### Part III. Analysis of the cleavage sites of pseudoalterin on bovine elastin fibers

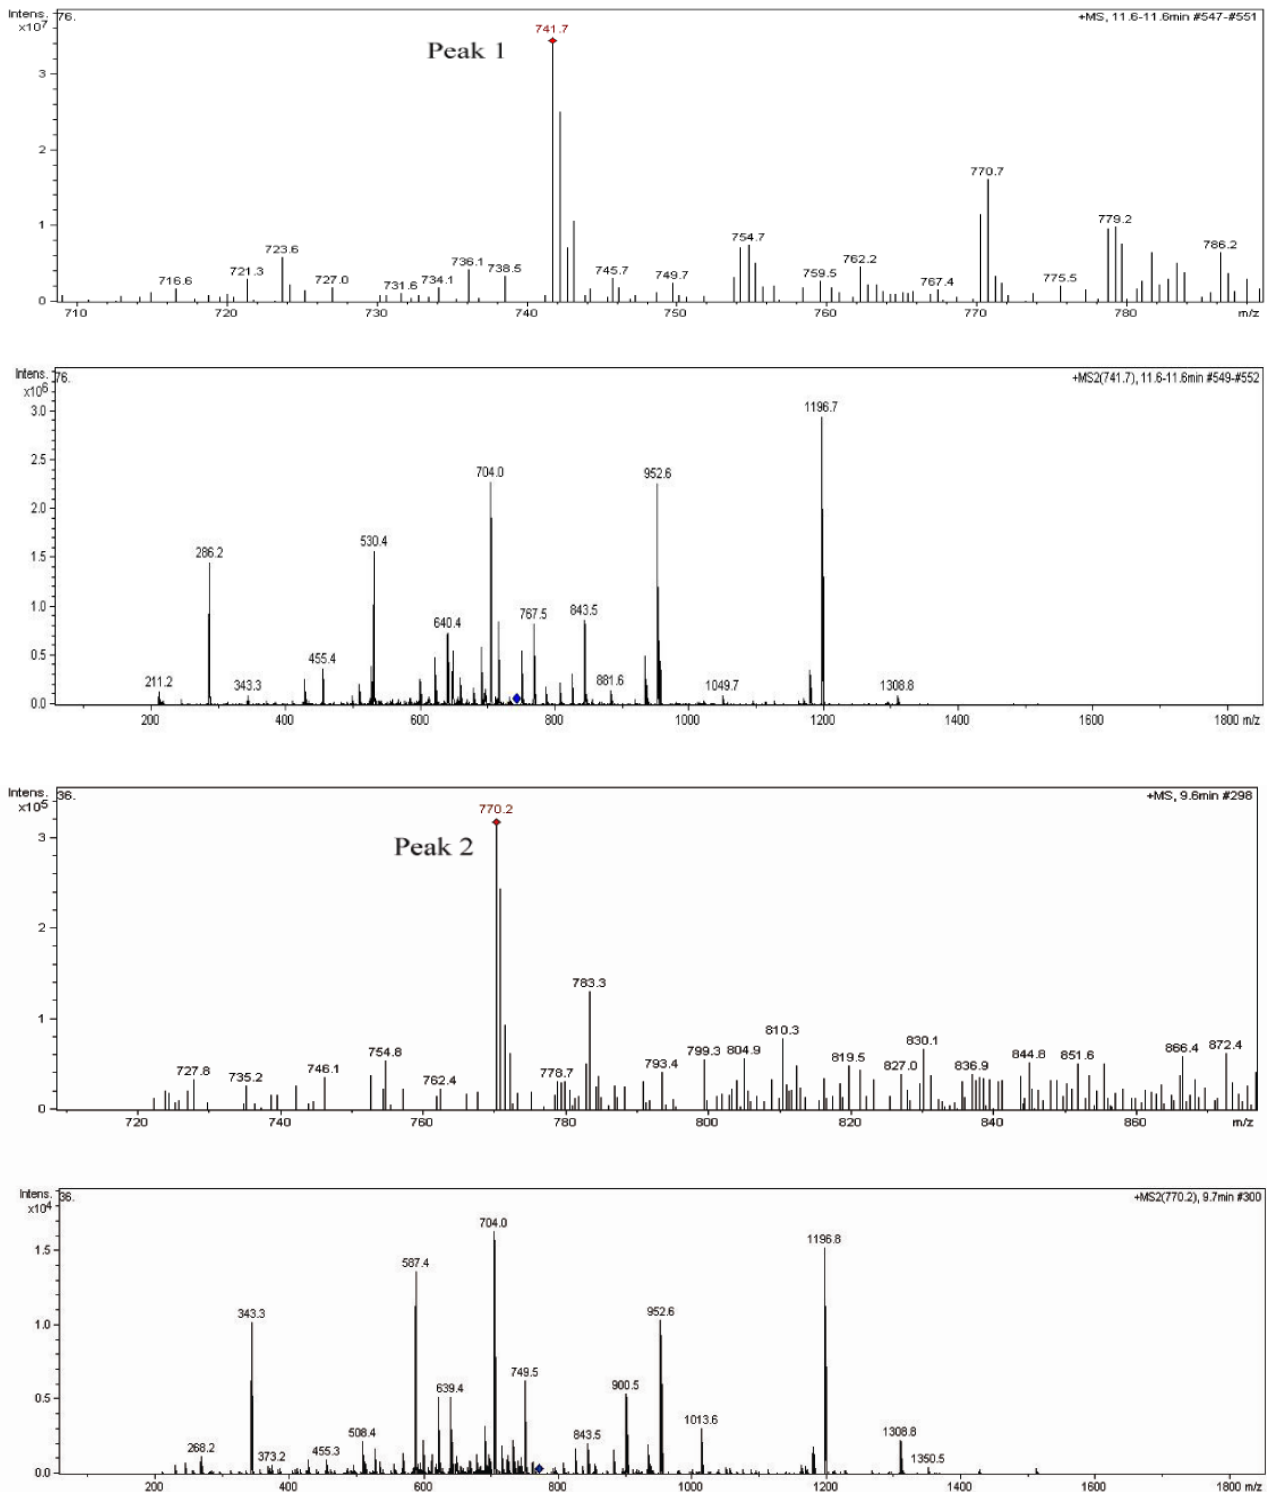

Fig. S8. Partial LC-MS analysis of the molecular weights of the peptides released from bovine elastin fibers by pseudoalterin. For each peptide, the first spectra image is MS analysis and the second spectra image is the MS peak analyzed by secondary MS.

Table S3. The determined molecular masses and sequences of the 27 peptides released from bovine elastin fibers by pseudoalterin.

| Peak number | m/z Measured (Da) | MH <sup>+</sup> Matched (Da) | Peptide <sup>a</sup>                       | RT (min) | Position |
|-------------|-------------------|------------------------------|--------------------------------------------|----------|----------|
| 1           | 741.67            | 1481.811                     | (G)AAGLGGVVLGAGQPFPIG(G)                   | 11.60    | 697-713  |
| 2           | 770.22            | 1538.833                     | (G)AAGLGGVVLGAGQPFPIGG(G)                  | 9.68     | 697-714  |
| 3           | 770.09            | 1538.854                     | (G)GLGVSTGAVVPQLGAGVG(A)                   | 8.40     | 125-142  |
| 4           | 933.68            | 1865.991                     | (G)GVPGAVPGGVPGGVFFPGAGLG(G)               | 11.22    | 28-49    |
| 5           | 1005.93           | 2010.175                     | (G)VAPGVGVVPGVGVVPGVGVAPGIG(L)             | 9.98     | 505-528  |
| 6           | 556.99            | 1112.610                     | (G)GVLGAGQPFPIG(G)                         | 9.68     | 696-707  |
| 7           | 734.65            | 1467.817                     | (G)GVGGLGVSTGAVVPQLG(A)                    | 8.46     | 122-138  |
| 8           | 782.69            | 1563.886                     | (G)GVGGLGVSTGAVVPQLGAGVG(A)                | 11.47    | 122-142  |
| 9           | 1331.44           | 2660.550                     | (G)VAPGVGVVPGVGVVPGVGVAPGIGLPGGVIG(A)      | 11.67    | 505-536  |
| 10          | 642.07            | 1282.715                     | (G)LGGVVLGAGQPFPIG(G)                      | 9.19     | 694-707  |
| 11          | 1011.75           | 2021.139                     | (G)LGVGGIGGVGGLGVSTGAVVPQLG(A)             | 11.51    | 115-138  |
| 12          | 848.19            | 1694.944                     | (G)GIGGVGGLGVSTGAVVPQLG(A)                 | 9.17     | 119-138  |
| 13          | 999.27            | 1996.159                     | (G)LPGVGVAPGVGVVPGVGVVPGVGV(V)             | 11.87    | 499-522  |
| 14          | 585.50            | 1169.631                     | (G)GVLGAGQPFPIGG(G)                        | 8.02     | 696-708  |
| 15          | 778.62            | 1555.827                     | (G)AVPGGVPGGVFFPGAGLG(G)                   | 10.09    | 32-49    |
| 16          | 1571.02           | 3140.819                     | (G)LPGVGVAPGVGVVPGVGVVPGVGVAPGIGLPGGVIG(A) | 14.06    | 499-536  |
| 17          | 628.05            | 1254.705                     | (G)GLGVSTGAVVPQLG(A)                       | 7.58     | 125-138  |
| 18          | 484.49            | 967.557                      | (G)GLGAVPGAVGLG(G)                         | 9.07     | 665-676  |
| 19          | 422.49            | 843.436                      | (G)AGQPFPIGG(G)                            | 5.78     | 700-708  |
| 20          | 990.19            | 1979.092                     | (G)GIGGVGGLGVSTGAVVPQLGAGVG(A)             | 10.10    | 119-142  |
| 21          | 676.06            | 1350.775                     | (G)GLGVGGLGAVPGAVGLG(G)                    | 9.06     | 660-676  |
| 22          | 599.56            | 1197.684                     | (G)LGVSTGAVVPQLG(A)                        | 7.85     | 126-138  |
| 23          | 413.38            | 825.483                      | (G)AGVLPGVGVG(G)                           | 6.66     | 281-290  |
| 24          | 441.91            | 882.204                      | (G)GAGVLPGVGVG(G)                          | 6.46     | 280-290  |
| 25          | 1137.82           | 2275.256                     | (G)AGVPGPGAVPGTLAAAKAAKFGPGGVG(A)          | 11.09    | 590-616  |
| 26          | 719.60            | 1437.821                     | (G)ARFPGIGVLPGVPTG(A)                      | 8.83     | 169-183  |
| 27          | 893.2             | 1786.908                     | (S)AGKAGYPTGTGVGPQAAAAAA(K)                | 19.8     | 250-270  |

**a** The sequence of each peptide in black was determined by liquid chromatography-mass spectrometry and MASCOT MS/MS Ion Research tools. The left bracketed residue of each peptide indicates the P1-site residue of the left cleavage site. The right bracketed residue of each peptide indicates the P1'-site residue of the right cleavage site.

Table S4. Specificity matrix of pseudoalterin to bovine elastin fibers based on 32 cleavage sites.

| Amino acid | P4 | P3 | P2 | P1 | P1' | P2' | P3' | P4' |
|------------|----|----|----|----|-----|-----|-----|-----|
| Gly        | 11 | 17 | 3  | 31 | 14  | 12  | 13  | 15  |
| Ala        | 6  | 4  | 5  | 1  | 11  | 5   | 2   | 2   |
| Ser        | 1  | 0  | 0  | 0  | 0   | 0   | 1   | 1   |
| Gln        | 0  | 3  | 0  | 0  | 0   | 0   | 1   | 0   |
| Pro        | 6  | 2  | 2  | 0  | 0   | 1   | 6   | 4   |
| Val        | 3  | 4  | 9  | 0  | 2   | 7   | 7   | 5   |
| Leu        | 3  | 0  | 6  | 0  | 4   | 5   | 1   | 2   |
| Lys        | 0  | 1  | 0  | 0  | 1   | 0   | 0   | 2   |
| Arg        | 0  | 0  | 0  | 0  | 0   | 1   | 0   | 0   |
| Phe        | 2  | 0  | 2  | 0  | 0   | 0   | 1   | 0   |
| Thr        | 0  | 0  | 1  | 0  | 0   | 0   | 0   | 0   |
| Ile        | 0  | 1  | 4  | 0  | 0   | 1   | 0   | 1   |

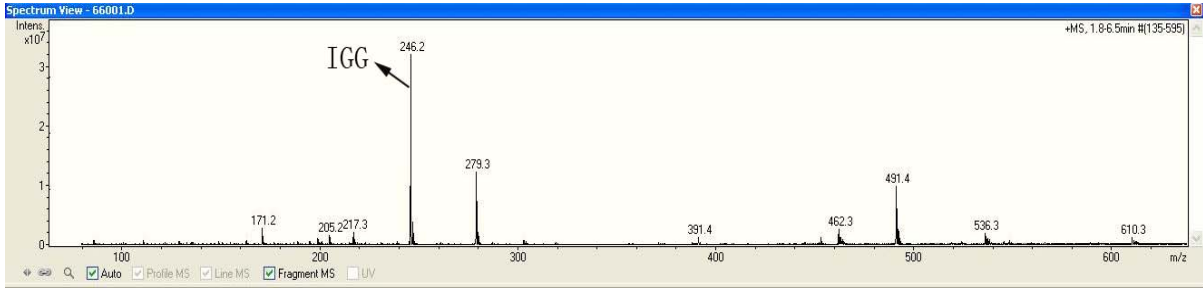

**A**

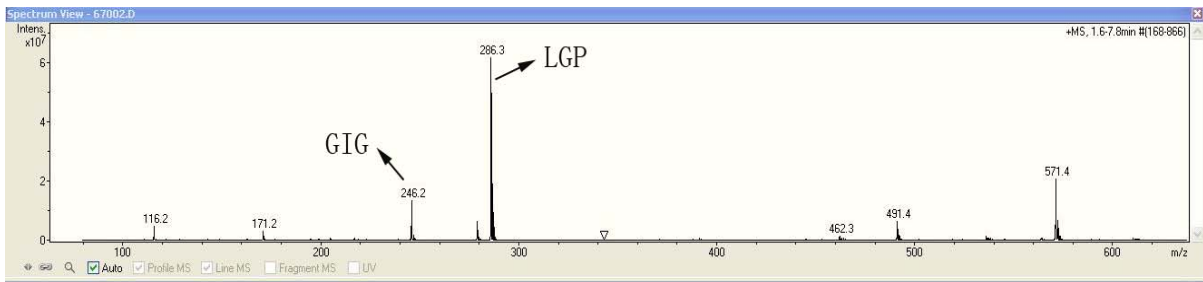

**B**

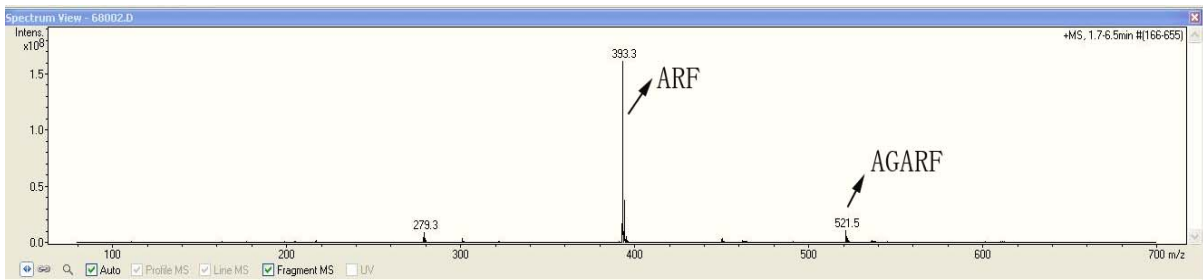

**C**

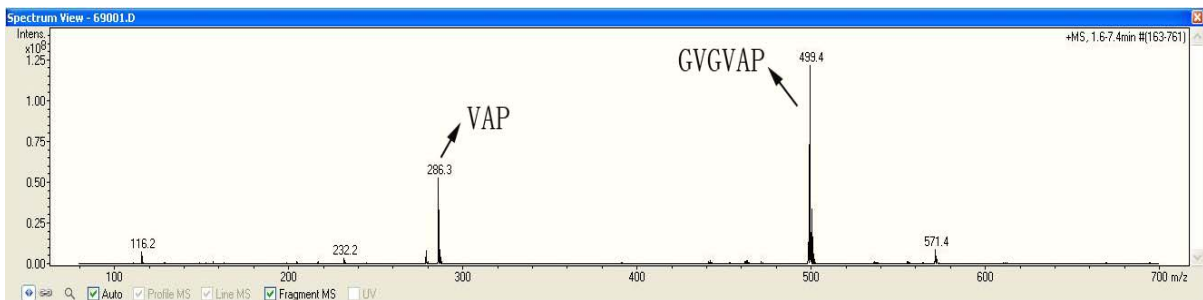

**D**

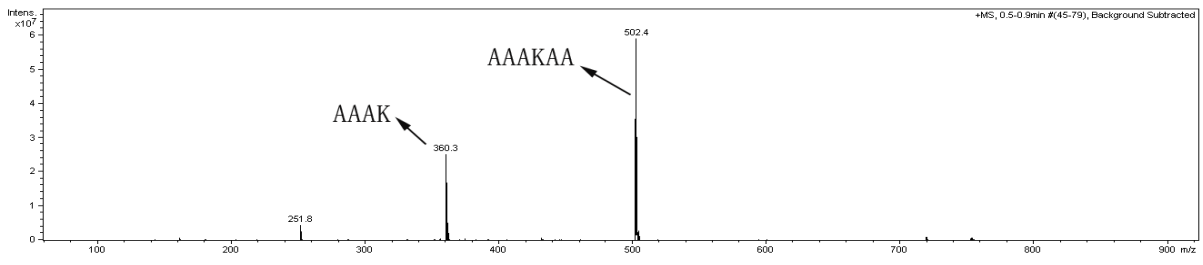

**E**

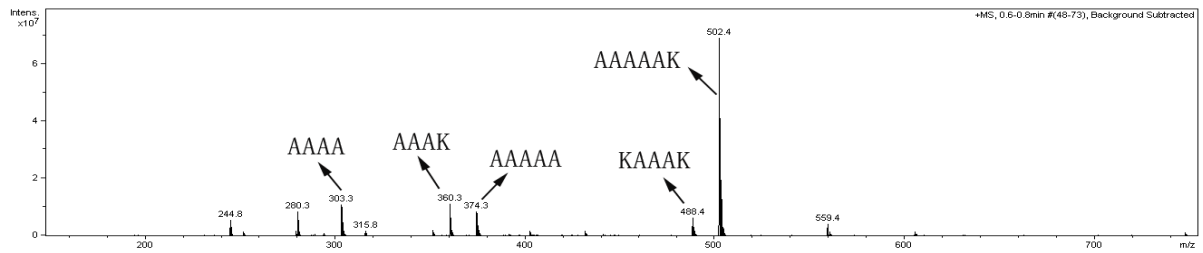

**F**

Fig. S9. Analysis of the degradation of the synthetical peptides hydrolysates with pseudoalterin. The molecular masses and sequences of all the peptides were analyzed by LC/MS and FindPept Tool at expasy website, respectively. A, IGGGAGG; B, GIGLGP; C, PGAGARF; D, GVGVP; E, AAKAA; F, AAAAAKAAK.



Table S5. M23 family proteases<sup>a</sup> predicted from marine sediment and hydrothermal vent bacteria

| Strains                                            | Genome No. | Location              | Accession No. of proteases in M23                                                                                                  |
|----------------------------------------------------|------------|-----------------------|------------------------------------------------------------------------------------------------------------------------------------|
| <i>Polaromonas</i> sp. JS666 (1)                   | CP000316   | Sed <sup>b</sup>      | ABE46000.1, ABE42783.1                                                                                                             |
| <i>Roseobacter denitrificans</i> OCh 114 (2)       | CP000362   | Australia sed         | ABG30058.1                                                                                                                         |
| <i>Nautilia profundicola</i> Am-H (3)              | CP001279   | Ven <sup>c</sup>      | ACM93731.1, ACM93477.1                                                                                                             |
| <i>Nitratiruptor</i> sp. SB155-2 (4)               | AP009178   | Ven in Iheya          | BAF69457.1                                                                                                                         |
| <i>Sulfurovum</i> sp. NBC37-1 (5)                  | AP009179   | Ven in Iheya          | BAF72920.1, BAF72695.1                                                                                                             |
| <i>Thermotoga maritima</i> MSB8 (6)                | AE000512   | Sed near Vulcano      | AAD36886.1                                                                                                                         |
| <i>Persephonella marina</i> EX-H1 (7)              | CP001230   | Ven in Pacific        | ACO04799.1, ACO03251.1                                                                                                             |
| <i>Candidatus Ruthia magnifica</i> Cm (8)          | CP000488   | Ven                   | ABL02478.1, ABL01827.1                                                                                                             |
| <i>Thiomicrospira crunogena</i> XCL-2 (9)          | CP000109   | Ven                   | ABB41394.1, ABB40948.1                                                                                                             |
| <i>Alcanivorax borkumensis</i> SK2 (10)            | AM286690   | Sed in North Sea      | CAL17579.1, CAL16054.1, CAL16619.1, CAL17648.1                                                                                     |
| <i>Desulfobacterium autotrophicum</i> HRM2 (11)    | CP001087   | Mediterranean sea sed | ACN14260.1                                                                                                                         |
| <i>Hahella chejuensis</i> KCTC 2396 (12)           | CP000155   | Cheju Island sed      | ABC28216.1, ABC28556.1, ABC28713.1, ABC29831.1, ABC31053.1, ABC31896.1, ABC32524.1, ABC32886.1, ABC32948.1, ABC33568.1, ABC29581.1 |
| <i>Shewanella sediminis</i> HAW-EB3 (13)           | CP000821   | Sed in Halifax Harbor | ABV39073.1, ABV36423.1, ABV35714.1                                                                                                 |
| <i>Shewanella halifaxensis</i> HAW-EB4 (14)        | CP000931   | Sed in Emerald Basin  | ABZ77255.1, ABZ75798.1, ABZ74618.1                                                                                                 |
| <i>Shewanella</i> sp. W3-18-1 (15)                 | CP000503   | Sed in Pacific Ocean  | ABM25854.1, ABM26841.1, ABM24560.1, ABM24105.1, ABM25390.1                                                                         |
| <i>Shewanella piezotolerans</i> WP3 (16)           | CP000472   | Sed in Pacific        | ACJ29884.1, ACJ29020.1, ACJ28150.1                                                                                                 |
| <i>Salinispora arenicola</i> CNS-205 (17)          | CP000850   | Tropical sed          | ABW00492.1, ABV99987.1, ABV99986.1, ABV98343.1, ABV97281.1, ABV97111.1, ABV96162.1                                                 |
| <i>Idiomarina loihiensis</i> L2-TR (18)            | AE017340   | Lo'ihi Seamount ven   | AAV81179.1, AAV83434.1, AAV82097.1, AAV81287.1, AAV81075.1                                                                         |
| <i>Shewanella loihica</i> PV-4 (19)                | CP000606   | Naha ven              | ABO24321.1, ABO23341.1, ABO23082.1                                                                                                 |
| <i>Oceanobacillus iheyensis</i> strain HTE831 (20) | BA000028   | Iheya deep sea mud    | Not found                                                                                                                          |
| <i>Geobacillus kaustophilus</i> strain HTA426 (21) | BA000043   | Mariana Trench sed    | Not found                                                                                                                          |

<sup>a</sup> The proteases were all secretory proteins predicted with SignalP 3.0 (possibility >0.5).

<sup>b</sup> Sed, sediment.

<sup>c</sup> Ven, hydrothermal vent.

## REFERENCE

1. Mattes, T. E., Alexander, A. K., Richardson, P. M., Munk, A. C., Han, C. S., Stothard, P., and Coleman, N. V. (2008) *Appl. Environ. Microbiol.* **74**, 6405–6416
2. Swingley, W. D., Sadekar, S., Mastrian, S. D., Matthies, H. J., Hao, J., Ramos, H., Acharya, C. R., Conrad, A. L., Taylor, H. L., Dejesa, L. C., Shah, M. K., O’Huallachain, M. E., Lince, M. T., Blankenship, R. E., Beatty, J. T., and Touchman, J. W. (2007) *J. Bacteriol.* **189**, 683–690
3. Campbell, B. J., Smith, J. L., Hanson, T. E., Klotz, M. G., Stein, L. Y., Lee, C. K., Wu, D. Y., Robinson, J. M., Khouri, H. M., Eisen, J. A., and Cary, S. C. (2009) *PloS Genet.* **5**, e1000362
4. Nakagawa, S., Takai, K., Inagaki, F., Hirayama, H., Nunoura, T., Horikoshi, K., and Sako, Y. (2005) *Environ. Microbiol.* **7**, 1619–1632
5. Nakagawa, S., Takaki, Y., Shimamura, S., Reysenbach, A. L., Takai, K., and Horikoshi, K. (2007) *Proc. Natl. Acad. Sci. U.S.A.* **104**, 12146–12150
6. Nelson, K. E., Clayton, R. A., Gill, S. R., Gwinn, M. L., Dodson, R. J., Haft, D. H., Hickey, E. K., Peterson, J. D., Nelson, W. C., Ketchum, K. A., McDonald, L., Utterback, T. R., Malek, J. A., Linher, K. D., Garrett, M. M., Stewart, A. M., Cotton, M. D., Pratt, M. S., Phillips, C. A., Richardson, D., Heidelberg, J., Sutton, G. G., Fleischmann, R. D., Eisen, J. A., White, O., Salzberg, S. L., Smith, H. O., Venter, J. C., and Fraser, C. M. (1999) *Nature* **399**, 323–329
7. Reysenbach, A. L., Hamamura, N., Podar, M., Griffiths, E., Ferreira, S., Hochstein, R., Heidelberg, J., Johnson, J., Mead, D., Pohorille, A., Sarmiento, M., Schweighofer, K., Seshadri, R., and Voytek, M. A. (2009) *J. Bacteriol.* **191**, 1992–1993
8. Newton, L. G., Woyke, T., Auchtun, T. A., Dilly, G. F., Dutton, R. J., Fisher, M. C., Fontanez, K. M., Lau, E., Stewart, F. J., Richardson, P. M., Barry, K. W., Saunders, E., Detter, J. C., Wu, D., Eisen, J. A., and Cavanaugh, C. M. (2007) *Science* **315**, 998–1000
9. Scott, K. M., Sievert, S. M., Abril, F. N., Ball, L. A., Barrett, C. J., Blake, R. A., Boller, A. J., Chain, P. S. G., Clark, J. A., Davis, C. R., Detter, C., Do, K. F., Dobrinski, K. P., Faza, B. I., Fitzpatrick, K. A., Freyermuth, S. K., Harmer, T. L., Hauser, L. J., Hugler, M., Kerfeld, C. A., Klotz, M. G., Kong, W. W., Land, M., Lapidus, A., Larimer, F. W., Longo, D. L., Lucas, S., Malfatti, S. A., Massey, S. E., Martin, D. D., McCuddin, Z., Meyer, F., Moore, J. L., Ocampo Jr., L. H., Paul, J. H., Paulsen, I. T., Reep, D. K., Ren, Q. H., Ross, R. L., Sato, P. Y., Thomas, P., Tinkham, L. E., and Zeruth, G. T. (2006) *PloS Biol.* **4**, e383
10. Schneiker, S., Martins dos Santos, V. A., Bartels, D., Bekel, T., Brecht, M., Buhrmester, J., Chernikova, T. N., Denaro, R., Ferrer, M., Gertler, C., Goesmann, A., Golyshina, O., Kaminski, F., Khachane, A., Lang, S., Linke, B., McHardy, A., Meyer, F., Nechitaylo, T., Puhler, A., Regenhardt, D., Rupp, O., Sabirova, J., Selbitschka, W., Yakimov, M., Timmis, K. N., Vorholter, F. J., Weidner, S., Kaiser, O., and Golyshin, P. N. (2006) *Nat. Biotechnol.* **24**, 997–1004
11. Strittmatter, A. W., Llesegang, H., Rabus, R., Decker, I., Amann, J., Andres, S., Henne, A., Fricke, W. F., Arlas, R. M., Bartels, D., Goesmann, A., Krause, L., Pühler, A., Klenk, H. P., Richter, M., Schüler, M., Glöckner, F. O., Meyerderks, A., Gottschalk, G., and Amann, R. (2009) *Environ. Microbiol.* **11**, 1038–1055
12. Jeong, H., Yim, J. H., Lee, C., Choi, S. H., Park, Y. K., Yoon, S. H., Hur, C. G., Kang, H. Y., Kim, D., Lee, H. H., Park, K. H., Park, S. H., Park, H. S., Lee, H. K., Oh, T. K., and Kim, J. F. (2005) *Nucleic Acids Res.* **33**, 7066–7073
13. Zhao, J. S., Manno, D., Beaulieu, C., Paquet, L., and Hawari, J. (2005) *Int. J. Syst. Evol. Microbiol.* **55**, 1511–1520

14. Zhao, J. S., Manno, D., Leggiadro, C., O'Neil, D., and Hawari, J. (2006) *Int. J. Syst. Evol. Microbiol.* **56**, 205–212
15. Pembroke, J. T., and Piterina, A. V. (2006) *FEMS Microbiol. Lett.* **264**, 80–88
16. Wang, F. P., Wang, J. B., Jian, H. H., Zhang, B., Li, S. K., Wang, F., Zeng, X. W., Gao, L., Bartlett, D. H., Yu, J., Hu, S. N., and Xiao, X. (2008) *PloS One* **3**, e1937
17. Schultz, A. W., Oh, D. C., Carney, J. R., Williamson, R. T., Udvary, D. W., Jensen, P. R., Gould, S. J., Fenical, W., and Moore, B. S. (2008) *J. Am. Chem. Soc.* **130**, 4507–4516
18. Hou, S. B., Saw, J. H., Lee, K. S., Freitas, T. A., Belisle, C., Kawarabayasi, Y., Donachie, S. P., Pikina, A., Galperin, M. Y., Koonin, E. V., Makarova, K. S., Omelchenko, M. V., Sorokin, A., Wolf, Y. I., Li, Q. X., Keum, Y. S., Campbell, S., Denery, J., Aizawa, S. I., Shibata, S., Malahoff, A., and Alam, M. (2004) *Proc. Natl. Acad. Sci. U.S.A.* **101**, 18036–18041
19. Gao, H. C., Obraztova, A., Stewart, N., Popa, R., Fredrickson, J. K., Tiedje, J. M., Nealson, K. H., and Zhou, J. Z. (2006) *Int. J. Syst. Evol. Microbiol.* **56**, 1911–1916
20. Takami, H., Takaki, Y., and Uchiyama, I. (2002) *Nucleic Acids Res.* **30**, 3927–3935
21. Takami, H., Nishi, S., Lu, J., Shimamura, S., and Takaki, Y. (2004) *Extremophiles* **8**, 351–356
